# Supplementary material for: Evolutionary transition from degenerate to nonredundant cytokine signaling networks supporting intrathymic T cell development
Source: PubMed Central journal article supplement — Proc Natl Acad Sci U S A. 2019 Dec 10;116(52):26759–67. doi: 10.1073/pnas.1915223116 (PMC6936713; doi:10.1073/pnas.1915223116), 2019-12-10
Supplement: pnas.1915223116.sapp.pdf [file pnas.1915223116.sapp.pdf]

**Supporting Information for**

Evolutionary transition from degenerate to non-redundant cytokine signaling  
networks supporting intrathymic T cell development

Divine-Fondzenyuy Lawir, Isabell Hess, Katarzyna Sikora, Norimasa Iwanam, Iliana  
Siamishi, Michael Schorpp, and Thomas Boehm

## A Genomic location

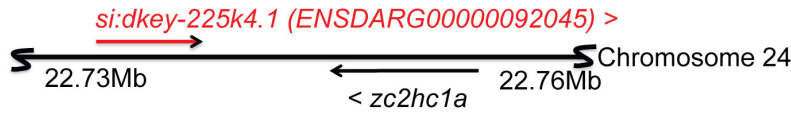

## B Transcripts

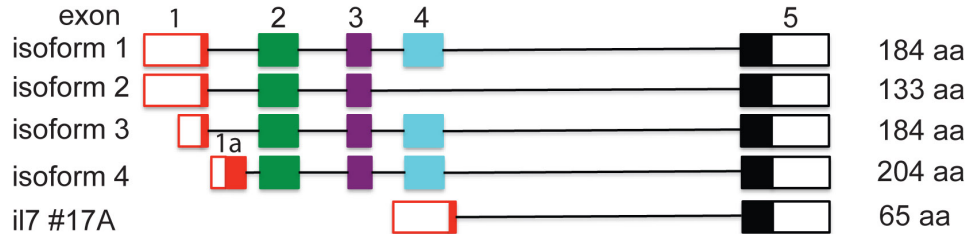

## C Conceptual translation of il7 transcript isoforms

1: **M** HLPGTSVLTLLIILLPLAFPCDYNSNRITEDYRNIISIKLEHV  
 VNGIKQLNSNCTSRNVGVRARWQATN  
 AQQTIKKICRVNSKLEIFGSESRIINGELKVIFNALVKEMNESLGRCRYQK  
 KQQKSPQNPQKWKLCVKVDILYSVQNYEYLHNTFQSMGNLRSKPEYSTWTPPTLQHSQDSGFD

2: **M** HLPGTSVLTLLIILLPLAFPCDYNSNRITEDYRNIISIKLEHV  
 VNGIKQLNSNCTSRNVGVRARWQATN  
 KQQKSPQNPQKWKLCVKVDILYSVQNYEYLHNTFQSMGNLRSKPEYSTWTPPTLQHSQDSGFD

3: **M** HLPGTSVLTLLIILLPLAFPCDYNSNRITEDYRNIISIKLEHV  
 VNGIKQLNSNCTSRNVGVRARWQATN  
 AQQTIKKICRVNSKLEIFGSESRIINGELKVIFNALVKEMNESLGRCRYQK  
 KQQKSPQNPQKWKLCVKVDILYSVQNYEYLHNTFQSMGNLRSKPEYSTWTPPTLQHSQDSGFD

4: **M** MRTLTLTSAPIAIIITGGFPVI  
 HLPGTSVLTLLIILLPLAFPCDYNSNRITEDYRNIISIKLEHV  
 VNGIKQLNSNCTSRNVGVRARWQATN  
 AQQTIKKICRVNSKLEIFGSESRIINGELKVIFNALVKEMNESLGRCRYQK  
 KQQKSPQNPQKWKLCVKVDILYSVQNYEYLHNTFQSMGNLRSKPEYSTWTPPTLQHSQDSGFD

il7 #17A: **M** KQQKSPQNPQKWKLCVKVDILYSVQNYEYLHNTFQSMGNLRSKPEYSTWTPPTLQHSQDSGFD

## D Sequence comparison of zebrafish and fugu il7 homologs

MHLPGTSVLTLLIILLPLAFPCDYNSN--RITEDYRNIISIKLEHV  
 MpLlciS-LlvLLLLPqsltCDrNqllrdaaElynaIvktldLDnt  
 --VNGIKQLNSNCTSRNVGVRARWQATNAQQT--IKKICRVNSKLE  
 renisaslqeisCpqlrfkaenctpntsdelntlhKlACRmit---  
 IFGSESRIINGELKVIFNALVKEMNESLGRCRYQK-----  
 -----LNldq---tkrLtesvlrSIGCPdapattttktsvs  
 -----KQQKSPQNPQKWKLCVKVDILYSVQNYEYLHNTFQSMG>  
 mktarpRkshKqktknwtrRLCKanaIvsSitecYEIlnSrIshs.

## E Sequence comparison of zebrafish and mouse il7 homologs

MHLPGTSVLTLLIILLPLAF-----PCDYNSNRITEDYRNI--ISIK-LEHVVNGIKQLNSNCTSRNVG  
 MfhvsfryIfgIppLiLvllpvtssChi-kdKegkaYesvlmISIdeLDkm----tgtDSNCpnnepn  
 VRARWQATNAQQTIKKICRVNSKLEIFGSESRIINGELKVIFNALVKEMNESL-----GRCRYQKKQQ  
 ffrKh-----vCddtkeaaflnraaRkLkqfLkMniseefnvhl1TvsggtqtlvnCtsKeek  
 KQKSPQNPQKWKLCVKVDILYSVQNYEYLHNTFQSMGNLRSKPEYSTWTPPTLQHSQDSGFD  
 --nvkeqkKndaCflKrLLreiktawnkilkgsi

**Fig. S1.** Characterization of the *il7* locus (ENSEMBL ID: ENSDARG00000092045). (A) Schematic of the region on chromosome 24 (GRCZ11) containing the *il7* gene (*si:dkey-225k4.1*) relative to the flanking *zc2hc1a* gene. (B) Structure of four transcript isoforms arising from the *il7* locus as determined by cDNA cloning; for comparison, the structure of the transcript emanating from the mutant *il7#I7A* allele is also indicated. In wild-type fish, isoform 1 represents the most prevalent transcript species. (C) Conceptual translation of the transcripts shown in (B). (D) Sequence comparison of the conceptually translated proteins for zebrafish and fugu (Genbank accession number NP\_001129620.1) *il7* proteins. (E) Sequence comparisons of the conceptually translated proteins for zebrafish and mouse (Genbank accession number NP\_032397.1) *il7* proteins. For (D) and (E), identical amino acid residues are in bold face capital letters.

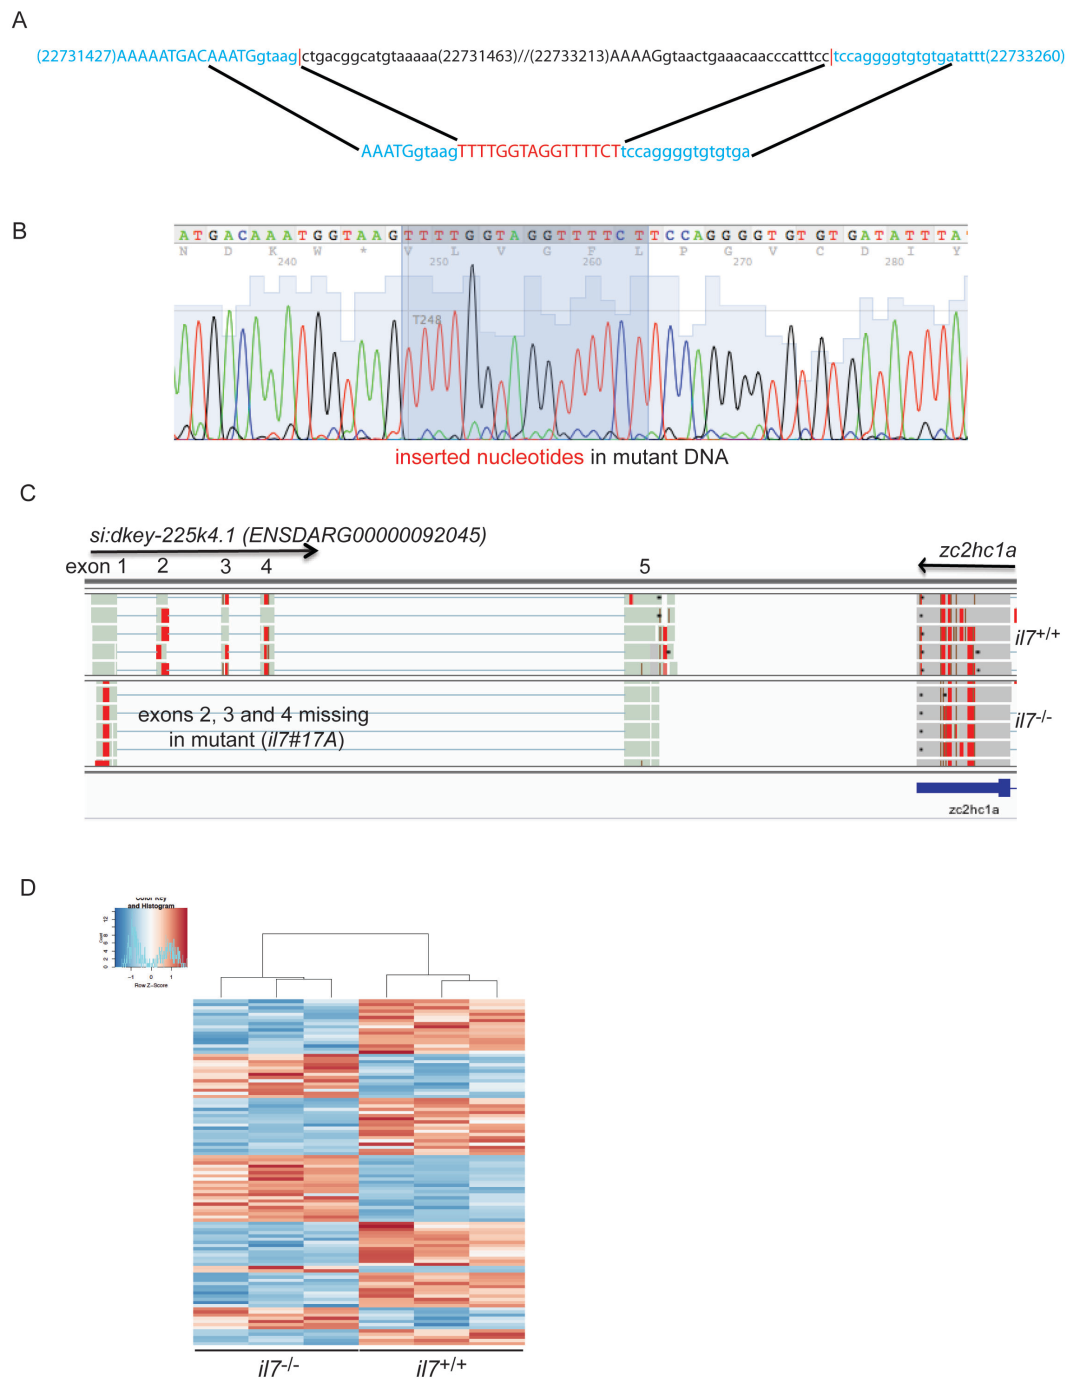

**Fig. S2.** Characterization of the *il7#17A* allele. (A) Sequence analysis of the breakpoint regions of the *il7#17A* allele. The nucleotide coordinates on chromosome 24 are indicated in brackets; exon sequences are in upper case, intron sequences are in lower case (compare to Fig. 1E). The 16 nucleotides of non-templated sequences joining the two ends of the deletion are indicated in red upper case. (B) Sanger sequence traces for the region across the deletion in the gene. (C) Kidney marrow RNA reads mapping to the *il7* genomic region, indicating that sequences corresponding to exons 2-4 are not present in transcripts of *il7*-deficient animals. By contrast, no differences in reads mapping to the *zc2hc1a* flanking gene are observed, as expected; n=5 each for each genotype. (D) Heat map displaying differentially expressed genes in wild-type and *il7*-deficient kidney marrow tissue (see Table S1).

Although only few changes are observed, they are highly reproducible across genotypes. When differential gene expression analysis was conducted using RNA from whole embryos at 5 dpf, no significantly expressed genes were found between wild-type and *il7*-deficient embryos, attesting to the negligible effects of the mutation in the context of the entire organism.

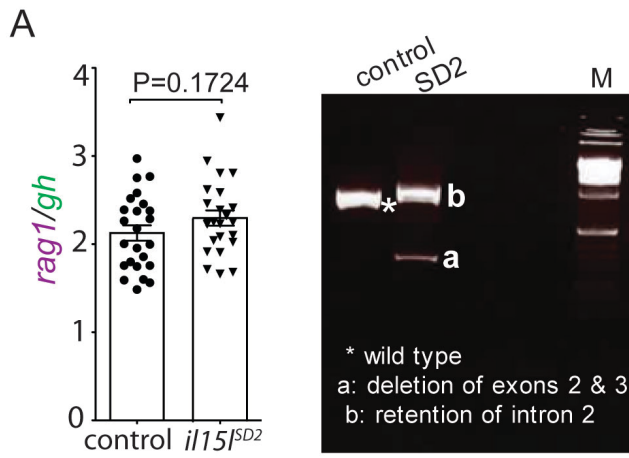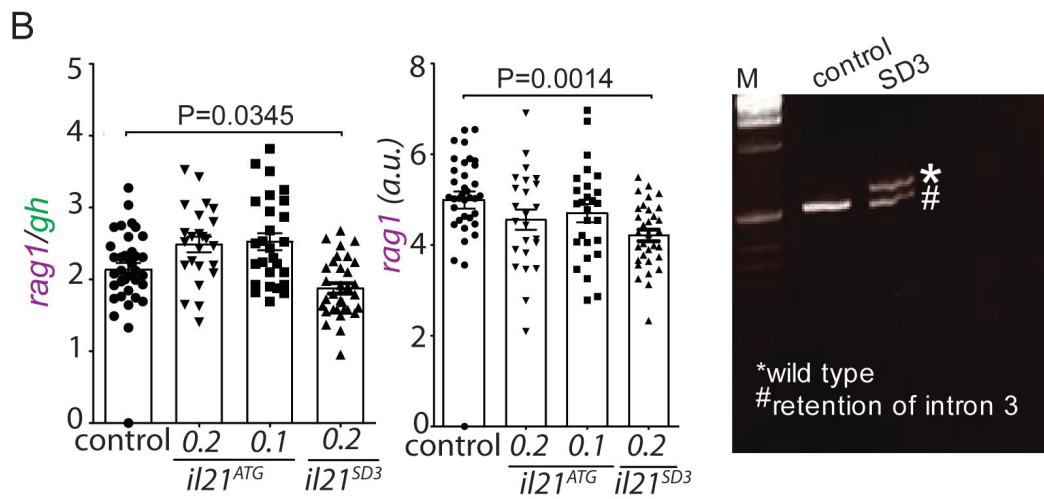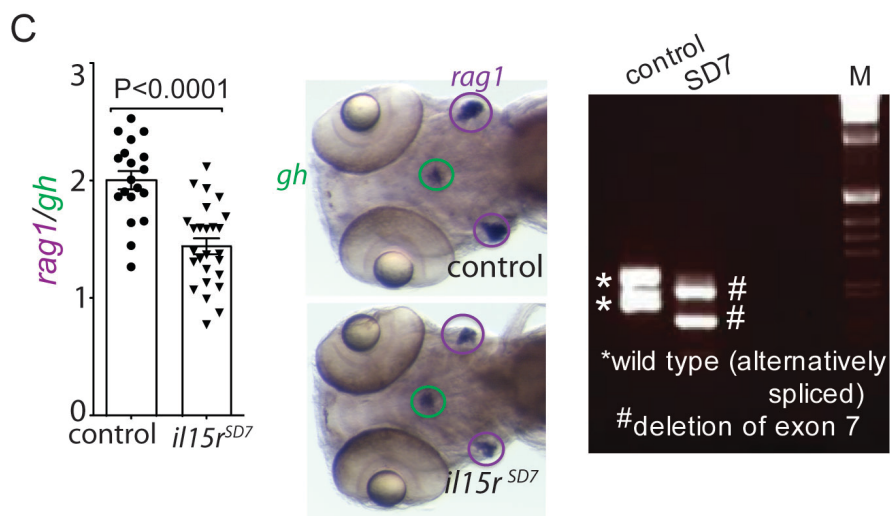

**Fig. S3.** Characterization of *il15l*, *il21*, and *il15r* morphants. (A) Unaffected thymopoietic activity in *il15l* morphants as determined by the thymopoietic index (left panel); each data point represents one fish; mean±SEM. RT-PCR analysis of *il15l* cDNA structures resulting from interference with splicing of the pre-mRNA transcripts by an anti-sense oligonucleotide targeting the splice donor site of exon 2 (SD2) (right panel). (B) Minor impairment of thymopoietic activity in *il21* morphants as determined by the thymopoietic index (left panel); each data point represents one fish; mean±SEM. RT-PCR analysis of *il21* cDNA structures resulting from interference with splicing of the pre-mRNA transcripts by an anti-sense oligonucleotide targeting the splice donor site of exon 3 (SD3). Note that the apparent reduction of the *rag1/gh* ratio in SD3 morphants is the result of slightly higher numbers of *gh*-expressing cells. The anti-sense oligonucleotides were also injected at higher concentrations than usual (0.2mM), as indicated. (C) Reduced thymopoietic activity in *il15r* morphants as determined by the thymopoietic index (left panel) derived from quantitative analysis of whole mount RNA *in situ* hybridization experiments (middle panel); each data point represents one fish; mean±SEM. RT-PCR analysis of *il15r* cDNA structures resulting from interference with splicing of the pre-mRNA transcripts by an anti-sense oligonucleotide targeting the splice donor site of exon 7 (SD7) (right panel).

## References

1. Kono T, et al. (2008) Characterization and expression analysis of an interleukin-7 homologue in the Japanese pufferfish, *Takifugu rubripes*. *FEBS J* 275:1213-1226.

**Table S1.** Differentially expressed genes in kidney marrow of wild-type and *il7*-deficient animals at 3 months of age. Gene ontology analysis indicates that no specific pathway is enriched among the differentially expressed genes. The results for *il7* (si:dkey-225k4.1) are highlighted in red font. Column headers (40) are as follows: (A) ENSEMBL gene ID; (B) mean values of normalized counts of all samples; (C) shrunken log<sub>2</sub> fold change; (D) unshrunken log<sub>2</sub> fold change; (E) error estimate for log<sub>2</sub> fold change; (F) Wald statistic (the ratio of log<sub>2</sub>FoldChange to lfcSE); (G) nominal p value from Wald test; (H) p value adjusted for multiple testing; (I) gene name; (J) gene description.

**Table S2.** Characterization of cytokine gene morphants.



**Table S1.** Differentially expressed genes in whole kidney marrow of *il7* mutants.

| ENSDARG             | baseMean   | log2FoldChange | lfcMLE     | lfcSE      | stat       | pvalue     | padj       | external_gene_name | description                                                                                                             |
|---------------------|------------|----------------|------------|------------|------------|------------|------------|--------------------|-------------------------------------------------------------------------------------------------------------------------|
| ENSDARG00000104174  | 365.562372 | -3.652385252   | -8.4705441 | 0.44963567 | -8.1229882 | 4.55E-16   | 1.22E-12   | CABZ01055168.2     |                                                                                                                         |
| ENSDARG00000095615  | 499.606917 | -3.146697949   | -3.8575524 | 0.35033465 | -8.9819775 | 2.66E-19   | 2.02E-15   | si:dkeyp-86h10.3   | si:dkeyp-86h10.3 [Source:ZFIN;Acc:ZDB-GENE-100922-65]                                                                   |
| ENSDARG00000059125  | 240.590854 | -3.142359103   | -5.485564  | 0.4414443  | -7.1183592 | 1.09E-12   | 2.13E-09   | prkacbb            | protein kinase, cAMP-dependent, catalytic, beta b [Source:ZFIN;Acc:ZDB-GENE-050904-4]                                   |
| ENSDARG00000104099  | 57.2553027 | -2.840196536   | -5.5314123 | 0.44823562 | -6.3363919 | 2.35E-10   | 3.37E-07   | FP236513.1         |                                                                                                                         |
| ENSDARG00000018491  | 2935.2848  | -2.802967341   | -3.6868129 | 0.38618335 | -7.2581259 | 3.92E-13   | 9.37E-10   | pdia4              | protein disulfide isomerase family A, member 4 [Source:ZFIN;Acc:ZDB-GENE-030131-5493]                                   |
| ENSDARG000000092780 | 60.7075222 | -2.562764073   | -4.3364727 | 0.44003615 | -5.8239854 | 5.75E-09   | 6.86E-06   | si:ch1073-170a4.1  | si:ch1073-170a4.1 [Source:ZFIN;Acc:ZDB-GENE-030131-7012]                                                                |
| ENSDARG00000099002  | 339.942527 | -2.482926247   | -3.5668736 | 0.41501122 | -5.982793  | 2.19E-09   | 2.94E-06   | creb5a             | cAMP responsive element binding protein 5a [Source:ZFIN;Acc:ZDB-GENE-120827-2]                                          |
| ENSDARG00000104213  | 255.291001 | -2.322481217   | -2.7357581 | 0.325106   | -7.143766  | 9.08E-13   | 1.95E-09   | si:dkey-283b1.6    | si:dkey-283b1.6 [Source:ZFIN;Acc:ZDB-GENE-120215-112]                                                                   |
| ENSDARG000000095461 | 16.9745885 | -2.100088539   | -4.966897  | 0.45583781 | -4.607096  | 4.08E-06   | 0.00224907 | pimr171            | Pim proto-oncogene, serine/threonine kinase, related 171 [Source:ZFIN;Acc:ZDB-GENE-141212-267]                          |
| ENSDARG00000092362  | 79.7775751 | -2.085136911   | -2.6729324 | 0.37447634 | -5.5681406 | 2.57E-08   | 2.91E-05   | hsp70.2            | heat shock cognate 70-kd protein, tandem duplicate 2 [Source:ZFIN;Acc:ZDB-GENE-110405-1]                                |
| ENSDARG00000054667  | 24.3391503 | -2.008014431   | -3.8509562 | 0.45186574 | -4.4438298 | 8.84E-06   | 0.0038741  | adra2db            | adrenergic, alpha-2D-, receptor b [Source:ZFIN;Acc:ZDB-GENE-021010-5]                                                   |
| ENSDARG00000069377  | 300.571195 | -1.945363144   | -3.3487352 | 0.44688581 | -4.3531549 | 1.34E-05   | 0.0052719  | si:dkey-242g16.2   | si:dkey-242g16.2 [Source:ZFIN;Acc:ZDB-GENE-030131-8324]                                                                 |
| ENSDARG00000055723  | 311.72777  | -1.938413421   | -2.9082653 | 0.42700554 | -4.539551  | 5.64E-06   | 0.0028829  | hsp70l             | heat shock cognate 70-kd protein, like [Source:ZFIN;Acc:ZDB-GENE-050321-1]                                              |
| ENSDARG00000094415  | 746.30401  | -1.933387496   | -4.2452213 | 0.45609534 | -4.2389986 | 2.25E-05   | 0.00803818 | si:ch211-264e16.2  | si:ch211-264e16.2 [Source:ZFIN;Acc:ZDB-GENE-060503-320]                                                                 |
| ENSDARG00000089202  | 160.566385 | -1.852985007   | -3.5810444 | 0.45408356 | -4.0807137 | 4.49E-05   | 0.01321159 | nkl3               | NK-lysin tandem duplicate 3 [Source:ZFIN;Acc:ZDB-GENE-131127-147]                                                       |
| ENSDARG00000092283  | 20.8293396 | -1.851475718   | -5.2401014 | 0.45422614 | -4.0761101 | 4.58E-05   | 0.01329365 | cxl34b.11          | CX chemokine ligand 34b, duplicate 11 [Source:ZFIN;Acc:ZDB-GENE-091204-33]                                              |
| ENSDARG00000096153  | 46.525934  | -1.836524679   | -2.9970189 | 0.44006757 | -4.1732789 | 3.00E-05   | 0.00992247 | si:dkey-21h14.9    | si:dkey-21h14.9 [Source:ZFIN;Acc:ZDB-GENE-110915-1]                                                                     |
| ENSDARG00000089377  | 23.2723451 | -1.800784766   | -3.0772028 | 0.44456921 | -4.0506286 | 5.11E-05   | 0.01402337 | si:ch211-232p21.6  | si:ch211-232p21.6 [Source:ZFIN;Acc:ZDB-GENE-131121-178]                                                                 |
| ENSDARG00000076211  | 74.6838469 | -1.798908392   | -2.1163999 | 0.32378352 | -5.5558985 | 2.76E-08   | 2.97E-05   | CABZ01059914.1     |                                                                                                                         |
| ENSDARG00000063518  | 32.1147812 | -1.796665237   | -3.3188226 | 0.45149999 | -3.9793251 | 6.91E-05   | 0.01786907 | zgc:153913         | zgc:153913 [Source:ZFIN;Acc:ZDB-GENE-061103-397]                                                                        |
| ENSDARG00000004262  | 1179.12843 | -1.787259695   | -1.9623243 | 0.25979336 | -6.8795433 | 6.00E-12   | 1.07E-08   | cyp46a1.4          | cytochrome P450, family 46, subfamily A, polypeptide 1, tandem duplicate 4 [Source:ZFIN;Acc:ZDB-GENE-040426-1224]       |
| ENSDARG00000075783  | 30.4859625 | -1.766681148   | -2.5423829 | 0.41572265 | -4.249663  | 2.14E-05   | 0.00779478 | hmgxb4a            | HMG box domain containing 4a [Source:ZFIN;Acc:ZDB-GENE-070912-675]                                                      |
| ENSDARG00000098547  | 13.2212484 | -1.766442171   | -3.8269807 | 0.45573085 | -3.8760645 | 0.00010616 | 0.02434187 | RNF222             | ring finger protein 222 [Source:HGNC Symbol;Acc:HGNC:34517]                                                             |
| ENSDARG00000004748  | 267.05039  | -1.755449336   | -2.5680736 | 0.42194912 | -4.1603342 | 3.18E-05   | 0.01018848 | zgc:100868         | zgc:100868 [Source:ZFIN;Acc:ZDB-GENE-040801-33]                                                                         |
| ENSDARG00000014967  | 55.3774229 | -1.754692353   | -3.4141113 | 0.45429144 | -3.8624817 | 0.00011224 | 0.02534481 | g6pcb              | glucose-6-phosphatase b, catalytic subunit [Source:ZFIN;Acc:ZDB-GENE-081223-2]                                          |
| ENSDARG00000025311  | 96.6939435 | -1.750512266   | -2.2737014 | 0.38153864 | -4.5880341 | 4.47E-06   | 0.00240286 | cuzd1.2            | CUB and zona pellucida-like domains 1, tandem duplicate 2 [Source:ZFIN;Acc:ZDB-GENE-131119-30]                          |
| ENSDARG00000069632  | 198.679812 | -1.728959838   | -2.8299878 | 0.44208447 | -3.9109264 | 9.19E-05   | 0.02219127 | emp1               | epithelial membrane protein 1 [Source:ZFIN;Acc:ZDB-GENE-070822-2]                                                       |
| ENSDARG00000076142  | 493.34555  | -1.722546718   | -2.5375238 | 0.42379539 | -4.0645716 | 4.81E-05   | 0.01360108 | trib1              | tribbles pseudokinase 1 [Source:ZFIN;Acc:ZDB-GENE-091207-4]                                                             |
| ENSDARG00000098036  | 139.588758 | -1.710673023   | -2.2288024 | 0.38336018 | -4.4623128 | 8.11E-06   | 0.0037352  | si:ch211-6910.4    | si:ch211-6910.4 [Source:ZFIN;Acc:ZDB-GENE-131127-259]                                                                   |
| ENSDARG00000093258  | 31.4124399 | -1.708650144   | -2.6378735 | 0.43108635 | -3.9635914 | 7.38E-05   | 0.01844133 | igl3v1             | immunoglobulin light 3 variable 1 [Source:ZFIN;Acc:ZDB-GENE-060503-880]                                                 |
| ENSDARG00000004746  | 4356.19391 | -1.706406995   | -2.1267265 | 0.36243364 | -4.7081916 | 2.50E-06   | 0.0014128  | hsp90aa1.2         | heat shock protein 90, alpha (cytosolic), class A member 1, tandem duplicate 2 [Source:ZFIN;Acc:ZDB-GENE-031001-3]      |
| ENSDARG00000093316  | 115.024016 | -1.690630948   | -2.2981004 | 0.40024571 | -4.2239827 | 2.40E-05   | 0.00827462 | adgrf8             | adhesion G protein-coupled receptor F8 [Source:ZFIN;Acc:ZDB-GENE-130531-41]                                             |
| ENSDARG00000063375  | 281.475539 | -1.650943534   | -1.927263  | 0.3189389  | -5.176363  | 2.26E-07   | 0.00019441 | pter               | phosphotriesterase related [Source:ZFIN;Acc:ZDB-GENE-060825-190]                                                        |
| ENSDARG00000091317  | 113.436982 | -1.643743075   | -2.2169669 | 0.39746681 | -4.135548  | 3.54E-05   | 0.01117802 | hunk               | hormonally up-regulated Neu-associated kinase [Source:ZFIN;Acc:ZDB-GENE-050309-240]                                     |
| ENSDARG00000037495  | 1040.53621 | -1.631467826   | -2.2910637 | 0.41142594 | -3.9653986 | 7.33E-05   | 0.01844133 | rtt4rl2b           | reticulon 4 receptor-like 2b [Source:ZFIN;Acc:ZDB-GENE-040310-2]                                                        |
| ENSDARG00000079004  | 159.322383 | -1.619908537   | -1.9948748 | 0.35528718 | -4.5594342 | 5.13E-06   | 0.00268731 | tanc2b             | tetratricopeptide repeat, ankyrin repeat and coiled-coil containing 2b [Source:ZFIN;Acc:ZDB-GENE-030131-7067]           |
| ENSDARG00000092045  | 41.2459884 | -1.602423221   | -2.454429  | 0.43095581 | -3.7183005 | 0.00020057 | 0.04026535 | si:dkey-225k4.1    | si:dkey-225k4.1 [Source:ZFIN;Acc:ZDB-GENE-091204-219]: il7                                                              |
| ENSDARG00000054343  | 114.481007 | -1.556045474   | -2.1212791 | 0.40153511 | -3.8752414 | 0.00010652 | 0.02434187 | slc7a8b            | solute carrier family 7 (amino acid transporter light chain, L system), member 8b [Source:ZFIN;Acc:ZDB-GENE-030616-586] |
| ENSDARG00000020224  | 28.2161641 | -1.526120095   | -2.0622913 | 0.39667407 | -3.8472898 | 0.00011943 | 0.02606999 | ERGIC2 (1 of many) | si:ch211-225b10.3 [Source:ZFIN;Acc:ZDB-GENE-130531-53]                                                                  |
| ENSDARG00000043531  | 4356.19225 | -1.50108755    | -1.7361376 | 0.31183605 | -4.8137075 | 1.48E-06   | 0.00099454 | jun                | jun proto-oncogene [Source:ZFIN;Acc:ZDB-GENE-030131-7859]                                                               |
| ENSDARG00000059055  | 108.973872 | -1.483135294   | -1.6705553 | 0.28716866 | -5.1646837 | 2.41E-07   | 0.00019899 | ft2                | alpha(1,3)fucosyltransferase gene 2 [Source:ZFIN;Acc:ZDB-GENE-990715-18]                                                |
| ENSDARG00000042940  | 74.9045507 | -1.476760558   | -2.0246467 | 0.40333374 | -3.6613861 | 0.00025085 | 0.04811252 | nab1a              | NGFI-A binding protein 1a (EGR1 binding protein 1) [Source:ZFIN;Acc:ZDB-GENE-050208-574]                                |
| ENSDARG00000060070  | 934.473929 | -1.457255143   | -1.669544  | 0.30362204 | -4.7995697 | 1.59E-06   | 0.00103504 | adcy7              | adenylate cyclase 7 [Source:ZFIN;Acc:ZDB-GENE-040713-1]                                                                 |
| ENSDARG00000105100  | 217.400284 | -1.412677452   | -1.7029216 | 0.3422761  | -4.1273038 | 3.67E-05   | 0.01126345 | si:dkey-3h2.2      | si:dkey-3h2.2 [Source:ZFIN;Acc:ZDB-GENE-070705-464]                                                                     |
| ENSDARG00000099401  | 1052.41063 | -1.412251786   | -1.6038207 | 0.2955863  | -4.7777986 | 1.77E-06   | 0.00110442 | ccl33.3            | chemokine (C-C motif) ligand 33, duplicate 3 [Source:ZFIN;Acc:ZDB-GENE-081104-131]                                      |
| ENSDARG00000099466  | 83.8234093 | -1.410026379   | -1.7897326 | 0.37150751 | -3.7954182 | 0.0001474  | 0.03123682 | si:dkey-190j3.2    | si:dkey-190j3.2 [Source:ZFIN;Acc:ZDB-GENE-050208-399]                                                                   |
| ENSDARG00000033587  | 177.833527 | -1.397339768   | -1.7272323 | 0.35777675 | -3.9056193 | 9.40E-05   | 0.02243198 | CABZ01088134.1     |                                                                                                                         |
| ENSDARG00000077473  | 3340.72322 | -1.393131989   | -1.5487659 | 0.27413091 | -5.0819953 | 3.73E-07   | 0.00029715 | mych               | myelocytomatosis oncogene homolog [Source:ZFIN;Acc:ZDB-GENE-030219-51]                                                  |
| ENSDARG000000040777 | 188.963549 | -1.334914331   | -1.6555102 | 0.35975191 | -3.7106525 | 0.00020673 | 0.04070414 | inhbb              | inhibin, beta B [Source:ZFIN;Acc:ZDB-GENE-990415-2]                                                                     |
| ENSDARG00000018263  | 845.649887 | -1.31505892    | -1.457374  | 0.27065143 | -4.8588657 | 1.18E-06   | 0.00081808 | pdia2              | protein disulfide isomerase family A, member 2 [Source:ZFIN;Acc:ZDB-GENE-040426-705]                                    |
| ENSDARG00000013576  | 183.480549 | -1.270090807   | -1.4509216 | 0.30086232 | -4.2215017 | 2.43E-05   | 0.00827462 | gad45bb            | growth arrest and DNA-damage-inducible, beta b [Source:ZFIN;Acc:ZDB-GENE-050223-1]                                      |
| ENSDARG000000041339 | 367.117883 | -1.25022754    | -1.3982657 | 0.28040918 | -4.4585657 | 8.25E-06   | 0.0037352  | KRT18 (1 of many)  | zgc:92380 [Source:ZFIN;Acc:ZDB-GENE-040801-221]                                                                         |
| ENSDARG00000098171  | 305.624215 | -1.210563123   | -1.3870966 | 0.30366171 | -3.9865517 | 6.70E-05   | 0.01777898 | zgc:162193         | zgc:162193 [Source:ZFIN;Acc:ZDB-GENE-030131-2035]                                                                       |

|                    |            |              |            |            |            |            |            |                   |                                                                                                     |
|--------------------|------------|--------------|------------|------------|------------|------------|------------|-------------------|-----------------------------------------------------------------------------------------------------|
| ENSDARG00000068851 | 1131.18029 | -1.207714306 | -1.3362706 | 0.26888141 | -4.4916244 | 7.07E-06   | 0.00345073 | rnf183            | ring finger protein 183 [Source:ZFIN;Acc:ZDB-GENE-060929-1090]                                      |
| ENSDARG00000074378 | 1367.14604 | -1.189104776 | -1.3603555 | 0.30244839 | -3.9315957 | 8.44E-05   | 0.0205983  | junba             | jun B proto-oncogene a [Source:ZFIN;Acc:ZDB-GENE-040426-2172]                                       |
| ENSDARG00000069787 | 338.515089 | -1.183897287 | -1.3099252 | 0.2687689  | -4.4048894 | 1.06E-05   | 0.00454701 | tmc6a             | transmembrane channel-like 6a [Source:ZFIN;Acc:ZDB-GENE-081114-3]                                   |
| ENSDARG00000104502 | 133.207963 | -1.183224126 | -1.3727404 | 0.31433392 | -3.7642267 | 0.00016707 | 0.03450701 | si:dkey-264f17.5  | si:dkey-264f17.5 [Source:ZFIN;Acc:ZDB-GENE-120703-23]                                               |
| ENSDARG00000021444 | 127.759635 | -1.16236149  | -1.3297152 | 0.30224013 | -3.8458212 | 0.00012015 | 0.02606999 | prfl1.2           | perforin 1.2 [Source:ZFIN;Acc:ZDB-GENE-111212-3]                                                    |
| ENSDARG00000074466 | 814.332087 | -1.14470246  | -1.230031  | 0.23168936 | -4.9406778 | 7.79E-07   | 0.00057666 | gdpd3a            | glycerophosphodiester phosphodiesterase domain containing 3a [Source:ZFIN;Acc:ZDB-GENE-040426-2279] |
| ENSDARG00000036074 | 10482.9159 | -1.143535976 | -1.212726  | 0.21156178 | -5.4052107 | 6.47E-08   | 6.05E-05   | cebpa             | CCAAT/enhancer binding protein (C/EBP), alpha [Source:ZFIN;Acc:ZDB-GENE-020111-2]                   |
| ENSDARG00000103980 | 3416.16554 | -1.084132763 | -1.1927201 | 0.26235181 | -4.1323624 | 3.59E-05   | 0.01117802 | ets2              | v-ets avian erythroblastosis virus E26 oncogene homolog 2 [Source:ZFIN;Acc:ZDB-GENE-050522-552]     |
| ENSDARG00000077726 | 1627.7123  | -1.057026908 | -1.1866961 | 0.28448574 | -3.7155708 | 0.00020275 | 0.0403257  | nocta             | nocturnin a [Source:ZFIN;Acc:ZDB-GENE-050208-306]                                                   |
| ENSDARG00000020788 | 247.053945 | -1.044011877 | -1.1487573 | 0.26240436 | -3.9786376 | 6.93E-05   | 0.01786907 | sla2              | Src-like adaptor 2 [Source:ZFIN;Acc:ZDB-GENE-080204-98]                                             |
| ENSDARG00000067741 | 2852.57841 | -1.036620565 | -1.1514317 | 0.2732365  | -3.7938583 | 0.00014832 | 0.03123682 | itpkcb            | inositol-trisphosphate 3-kinase Cb [Source:ZFIN;Acc:ZDB-GENE-080225-27]                             |
| ENSDARG00000077862 | 211.481611 | 4.144400758  | 6.38737769 | 0.41678422 | 9.94375636 | 2.69E-23   | 5.77E-19   | si:dkey-169i5.4   | si:dkey-169i5.4 [Source:ZFIN;Acc:ZDB-GENE-030131-8695]                                              |
| ENSDARG00000094550 | 54.4677971 | 3.868616434  | 8.30265427 | 0.43545681 | 8.88404156 | 6.45E-19   | 3.46E-15   | BX649490.2        |                                                                                                     |
| ENSDARG00000103982 | 38.6472731 | 3.637726645  | 6.34406382 | 0.42458505 | 8.56772201 | 1.06E-17   | 4.53E-14   | AL929185.1        |                                                                                                     |
| ENSDARG00000097247 | 193.417597 | 3.520053805  | 5.58205852 | 0.42729854 | 8.23792616 | 1.75E-16   | 6.27E-13   | BX322555.3        |                                                                                                     |
| ENSDARG00000100939 | 41.3706602 | 3.492372942  | 5.99580837 | 0.4267318  | 8.18399974 | 2.75E-16   | 8.43E-13   | CABZ01117603.1    |                                                                                                     |
| ENSDARG00000093570 | 96.1090932 | 3.281431213  | 4.1798187  | 0.36560226 | 8.97541286 | 2.82E-19   | 2.02E-15   | si:dkey-25o1.7    | si:dkey-25o1.7 [Source:ZFIN;Acc:ZDB-GENE-091204-375]                                                |
| ENSDARG00000051912 | 159.17244  | 2.936811263  | 4.7830739  | 0.43523434 | 6.74765529 | 1.50E-11   | 2.48E-08   | HPX (1 of many)   | zgc:152945 [Source:ZFIN;Acc:ZDB-GENE-060929-800]                                                    |
| ENSDARG00000096579 | 36.1545157 | 2.625400411  | 4.75828439 | 0.44440756 | 5.90764121 | 3.47E-09   | 4.39E-06   | si:dkey-9c18.3    | si:dkey-9c18.3 [Source:ZFIN;Acc:ZDB-GENE-121214-321]                                                |
| ENSDARG00000045758 | 69.2920642 | 2.55360694   | 3.47825917 | 0.39593944 | 6.44948862 | 1.12E-10   | 1.72E-07   | cracr2ab          | calcium release activated channel regulator 2Ab [Source:ZFIN;Acc:ZDB-GENE-041210-94]                |
| ENSDARG00000038770 | 51.5925112 | 2.465289324  | 7.34277656 | 0.45603771 | 5.4058892  | 6.45E-08   | 6.05E-05   | zgc:103625        | zgc:103625 [Source:ZFIN;Acc:ZDB-GENE-040912-116]                                                    |
| ENSDARG00000104185 | 233.056767 | 2.215258312  | 3.01424934 | 0.39948939 | 5.5452244  | 2.94E-08   | 3.00E-05   | AL831726.2        |                                                                                                     |
| ENSDARG00000086831 | 54.4465584 | 2.01667722   | 2.84724884 | 0.40974211 | 4.9218208  | 8.57E-07   | 0.00061395 | zmp:0000001228    | zmp:0000001228 [Source:ZFIN;Acc:ZDB-GENE-140106-188]                                                |
| ENSDARG00000092542 | 26.858509  | 1.9799767    | 4.29794332 | 0.45569711 | 4.34494024 | 1.39E-05   | 0.00534392 | BX005068.1        |                                                                                                     |
| ENSDARG00000042677 | 109.551621 | 1.972754557  | 2.65594554 | 0.39578853 | 4.98436517 | 6.22E-07   | 0.00047692 | cadm1b            | cell adhesion molecule 1b [Source:ZFIN;Acc:ZDB-GENE-080327-34]                                      |
| ENSDARG00000070138 | 20.1862819 | 1.66007827   | 3.12247969 | 0.43355572 | 4.53461395 | 5.77E-06   | 0.0028829  | si:dkey-84o3.3    | si:dkey-84o3.3 [Source:ZFIN;Acc:ZDB-GENE-091113-21]                                                 |
| ENSDARG00000096775 | 43.2614042 | 1.959134257  | 3.54484733 | 0.44970936 | 4.3564454  | 1.32E-05   | 0.005279   | BX119992.1        |                                                                                                     |
| ENSDARG00000068370 | 179.174824 | 1.873104886  | 2.81675469 | 0.42759341 | 4.38057474 | 1.18E-05   | 0.00498556 | ralgps1           | Ral GEF with PH domain and SH3 binding motif 1 [Source:ZFIN;Acc:ZDB-GENE-070720-16]                 |
| ENSDARG00000010610 | 467.4476   | 1.849353392  | 3.34896102 | 0.45110128 | 4.09964416 | 4.14E-05   | 0.01251922 | sarm1             | sterile alpha and TIR motif containing 1 [Source:ZFIN;Acc:ZDB-GENE-040219-1]                        |
| ENSDARG00000090722 | 78.9799493 | 1.842122372  | 4.61259154 | 0.45502701 | 4.0483803  | 5.16E-05   | 0.01402337 | leg1.1            | liver-enriched gene 1, tandem duplicate 1 [Source:ZFIN;Acc:ZDB-GENE-030131-1178]                    |
| ENSDARG00000079441 | 9.82573281 | 1.840144388  | 5.81440161 | 0.45315703 | 4.06072124 | 4.89E-05   | 0.01364779 | BX649448.1        |                                                                                                     |
| ENSDARG00000100793 | 43.2521232 | 1.786542352  | 2.30109443 | 0.37693108 | 4.73970556 | 2.14E-06   | 0.0012771  | CR450785.1        |                                                                                                     |
| ENSDARG00000045444 | 1298.42372 | 1.784147135  | 2.62970002 | 0.42382137 | 4.20966771 | 2.56E-05   | 0.00858389 | fdz8a             | frizzled class receptor 8a [Source:ZFIN;Acc:ZDB-GENE-000328-3]                                      |
| ENSDARG00000018048 | 509.905502 | 1.738049281  | 2.64725355 | 0.43076445 | 4.03480203 | 5.46E-05   | 0.01467377 | zgc:171704        | zgc:171704 [Source:ZFIN;Acc:ZDB-GENE-070820-16]                                                     |
| ENSDARG00000097299 | 209.832094 | 1.733594488  | 2.58088348 | 0.42585234 | 4.07088165 | 4.68E-05   | 0.01341432 | FLRT2 (1 of many) | fibronectin leucine rich transmembrane protein 2 [Source:HGNC Symbol;Acc:HGNC:3761]                 |
| ENSDARG00000101324 | 579.259794 | 1.711002804  | 3.30279113 | 0.45448226 | 3.76472961 | 0.00016673 | 0.03450701 | apoa1b            | apolipoprotein A-1b [Source:ZFIN;Acc:ZDB-GENE-050302-172]                                           |
| ENSDARG00000098550 | 1089.99044 | 1.68996073   | 2.39161057 | 0.41357614 | 4.08621424 | 4.38E-05   | 0.0130816  | F0904917.1        |                                                                                                     |
| ENSDARG00000102825 | 112.708263 | 1.658906966  | 2.38282417 | 0.41715581 | 3.9767083  | 6.99E-05   | 0.01786907 | olfm2b            | olfactomedin 2b [Source:ZFIN;Acc:ZDB-GENE-040426-2402]                                              |
| ENSDARG00000055026 | 239.715615 | 1.655150881  | 2.14636829 | 0.38202565 | 4.33256482 | 1.47E-05   | 0.0055424  | ptch2             | patched 2 [Source:ZFIN;Acc:ZDB-GENE-980526-44]                                                      |
| ENSDARG00000040065 | 158.191272 | 1.649689307  | 2.15217135 | 0.38430853 | 4.29261691 | 1.77E-05   | 0.00653984 | gja5a             | gap junction protein, alpha 5a [Source:ZFIN;Acc:ZDB-GENE-040407-3]                                  |
| ENSDARG00000102972 | 41.7261439 | 1.644747449  | 2.00857556 | 0.34918757 | 4.71021194 | 2.47E-06   | 0.0014128  | CABZ01075125.1    |                                                                                                     |
| ENSDARG00000021250 | 527.63317  | 1.644015736  | 2.34899386 | 0.41633626 | 3.94876906 | 7.86E-05   | 0.01939564 | slc25a48          | solute carrier family 25, member 48 [Source:ZFIN;Acc:ZDB-GENE-040718-60]                            |
| ENSDARG00000105518 | 12.2684861 | 1.619643329  | 7.12136176 | 0.44181285 | 3.66590366 | 0.00024647 | 0.04769686 | CABZ01078388.1    |                                                                                                     |
| ENSDARG00000008133 | 105.50819  | 1.617541979  | 2.10212803 | 0.38234095 | 4.23062708 | 2.33E-05   | 0.00820647 | foxl1             | forkhead box L1 [Source:ZFIN;Acc:ZDB-GENE-040426-1181]                                              |
| ENSDARG00000054418 | 636.352991 | 1.608578179  | 1.85619983 | 0.30976993 | 5.19281578 | 2.07E-07   | 0.0001854  | ssuh2.2           | ssu-2 homolog, tandem duplicate 2 [Source:ZFIN;Acc:ZDB-GENE-060421-4694]                            |
| ENSDARG00000068934 | 147.245427 | 1.514644773  | 2.12547082 | 0.41110861 | 3.68429353 | 0.00022934 | 0.04478551 | cyp1b1            | cytochrome P450, family 1, subfamily B, polypeptide 1 [Source:ZFIN;Acc:ZDB-GENE-030902-1]           |
| ENSDARG00000028163 | 750.108666 | 1.478038367  | 1.77419756 | 0.33965604 | 4.35157394 | 1.35E-05   | 0.005279   | prg4b             | proteoglycan 4b [Source:ZFIN;Acc:ZDB-GENE-041014-324]                                               |
| ENSDARG00000030723 | 179.435722 | 1.402835163  | 1.64134004 | 0.32085746 | 4.37214448 | 1.23E-05   | 0.00508241 | cldn11b           | claudin 11b [Source:ZFIN;Acc:ZDB-GENE-010328-13]                                                    |
| ENSDARG00000045544 | 71.0848191 | 1.349656806  | 1.6492801  | 0.35045221 | 3.85118651 | 0.00011755 | 0.02603119 | hgfa              | hepatocyte growth factor a [Source:ZFIN;Acc:ZDB-GENE-041014-2]                                      |
| ENSDARG00000070360 | 225.268356 | 1.323826732  | 1.59305431 | 0.34124879 | 3.87935954 | 0.00010473 | 0.02434187 | fam212aa          | family with sequence similarity 212, member Aa [Source:ZFIN;Acc:ZDB-GENE-060512-186]                |
| ENSDARG00000097891 | 123.646235 | 1.296809061  | 1.54282313 | 0.33327394 | 3.89112056 | 9.98E-05   | 0.02355411 | CR751227.2        |                                                                                                     |
| ENSDARG00000030844 | 2129.13483 | 1.289459296  | 1.53490845 | 0.33403454 | 3.86025742 | 0.00011327 | 0.02534481 | kif11a            | Kruppel-like factor 11a [Source:ZFIN;Acc:ZDB-GENE-030131-3568]                                      |
| ENSDARG00000040926 | 1312.99666 | 1.278658907  | 1.47092688 | 0.30728756 | 4.16111514 | 3.17E-05   | 0.01018848 | nox2f             | nuclear receptor subfamily 2, group F, member 2 [Source:ZFIN;Acc:ZDB-GENE-990415-252]               |
| ENSDARG00000030125 | 626.446510 | 1.110514879  | 1.26319793 | 0.29718131 | 3.73682617 | 0.00018636 | 0.03812523 | srz7              | SRZ (sex determining region Y)-box 7 [Source:ZFIN;Acc:ZDB-GENE-040109-4]                            |
| ENSDARG00000090752 | 364.540252 | 1.047438538  | 1.11629232 | 0.21937126 | 4.77473007 | 1.80E-06   | 0.00110442 | plk2a             | polo-like kinase 2a (Drosophila) [Source:ZFIN;Acc:ZDB-GENE-060810-71]                               |

**Table S2.** Generation and characterization of cytokine gene morphants.

| Gene         | ATG morpholino (5'>3')    | Splice morpholino (5'>3') | final concentration | target site in gene | Analysis primers      |                        |                      |                        | aberrant cDNA structure             |
|--------------|---------------------------|---------------------------|---------------------|---------------------|-----------------------|------------------------|----------------------|------------------------|-------------------------------------|
|              |                           |                           |                     |                     | First round forward   | First round reverse    | Second round forward | Second round reverse   |                                     |
| <i>i17</i>   | TGCATTTGTCAATTTTGAGGCATGT |                           | 0.1                 |                     |                       |                        |                      |                        |                                     |
| <i>i17</i>   |                           | GGAAATGGGTTGTTTCAGTTACCTT | 0.1                 | SD exon 4           | CAGTTACGCACTTGACGTTCT | CCTGAATCTTGTGAATGTTGCA | CGAAGCGATATAGCCCCATC | TTGTGAATGTTGAAAAGTGGGT | see Fig. 1D                         |
| <i>i12</i>   | AGAGCAGACATCCTCATCATCA    |                           | 0.1                 |                     | n/a                   |                        |                      |                        |                                     |
| <i>i12</i>   |                           | CAACCCTACAGAGAAACAGAGACAG | 0.1                 | SA exon 3           | CGCACACACTGATGATGATGA | TTCTGCCTCCATTGCTTCATC  | AGGATGTCTGCTCTACACTG | ACGTTCTCAGGAACGTCATG   | see Fig. 5C                         |
| <i>i115</i>  | AGAGGGTCACTGAAATCATCGAAGC |                           | 0.1                 |                     | n/a                   |                        |                      |                        |                                     |
| <i>i115</i>  |                           | GTTCTCTGCAAGAAATCACACACAC | 0.1                 | SD exon 2           | CGCTTCGATGATTCAGTGAC  | GGATGCCTGCTTGACCTTC    | TCGATGATTCAGTGACCTTC | GTCCTGCTTGACCTTCAGTC   | see Fig. 5F                         |
| <i>cr1f2</i> | ACACAACTCCAGTTGATCATGACT  |                           | 0.2                 |                     | n/a                   |                        |                      |                        |                                     |
| <i>cr1f2</i> |                           | TCTGCATGAAAGCAAAACAGCCTGT | 0.2                 | SA exon 3           | GCAGTACAAGCGCCAAATGTG | CTGAACTGCTCAGTGTCCAT   | GCCAATGTGAAAGACTGG   | TGGTACTTCAGGAAGAAGCAG  | cryptic splice site in exon 3 used. |
| <i>cr1f2</i> |                           | ACAGACATCTGTGACAAAATCTT   | 0.2                 | SA exon 4           | dito                  |                        |                      |                        | exon 4 is skipped.                  |
| <i>i1151</i> |                           | AGTAAATCATGTTGTACCACATTTG | 0.2                 | SD exon 2           | CAACAATGAGCGGGTGACGA  | ACTCTGCACTTGGATTTCCAC  | ACAATGAGCGGGTGACGACT | GTAATTGTGGACTTGGAGCAG  | see Fig. Fig. S3A                   |
| <i>i121</i>  | ACACGCCTTCATGTTTAAGATGTAC |                           | 0.2                 |                     | n/a                   |                        |                      |                        |                                     |
| <i>i121</i>  |                           | CATGTAATAAACACACACTCACGAT | 0.2                 | SD exon 3           | ACGGCCTCTCGATTACATC   | GAGATTCACCACCGGTGG     | AGGTGATCGAGCACCTGTGT | ACGCTTGACGGGCATAGATC   | see Fig. Fig. S3B                   |
| <i>i115r</i> | CATGTCACCTTGTCCAGAGAATCC  |                           | 0.1                 |                     | n/a                   |                        |                      |                        |                                     |
| <i>i115r</i> |                           | ATCTGAGCTGATGTTACTCACATTT | 0.1                 | SD exon 7           | CAATTGCCAGCAGCATCGCT  | TCTCGACGCTTGACCTCCA    | AGCAGCATCGCTACCAGACA | ACGCTTGACCTCCACCAGA    | see Fig. Fig. S3C                   |
